# Supplementary material for: The four-microRNA signature identified by bioinformatics analysis predicts the prognosis of nasopharyngeal carcinoma patients
Source: PubMed Central journal article supplement — Oncol Rep. 2019 Sep 16;42(5):1767–80. doi: 10.3892/or.2019.7316 (PMC6787970; doi:10.3892/or.2019.7316), 2019-09-16
Supplement: Supplementary_Data1.pdf [file Supplementary_Data1.pdf]

Figure S2. Visualizing the miRNA network using a heatmap plot in GSE32960. The heatmap describes the TOM among all DEMs in the analysis. Light colour represents a low overlap and a gradually darker colour indicates a higher overlap. Along the diagonal blocks of darker colours are the co-expression modules. The module assignment and gene dendrogram are also presented along the top and the left side. TOM, Topological Overlap Matrix; DEMs, differentially expressed miRNAs.

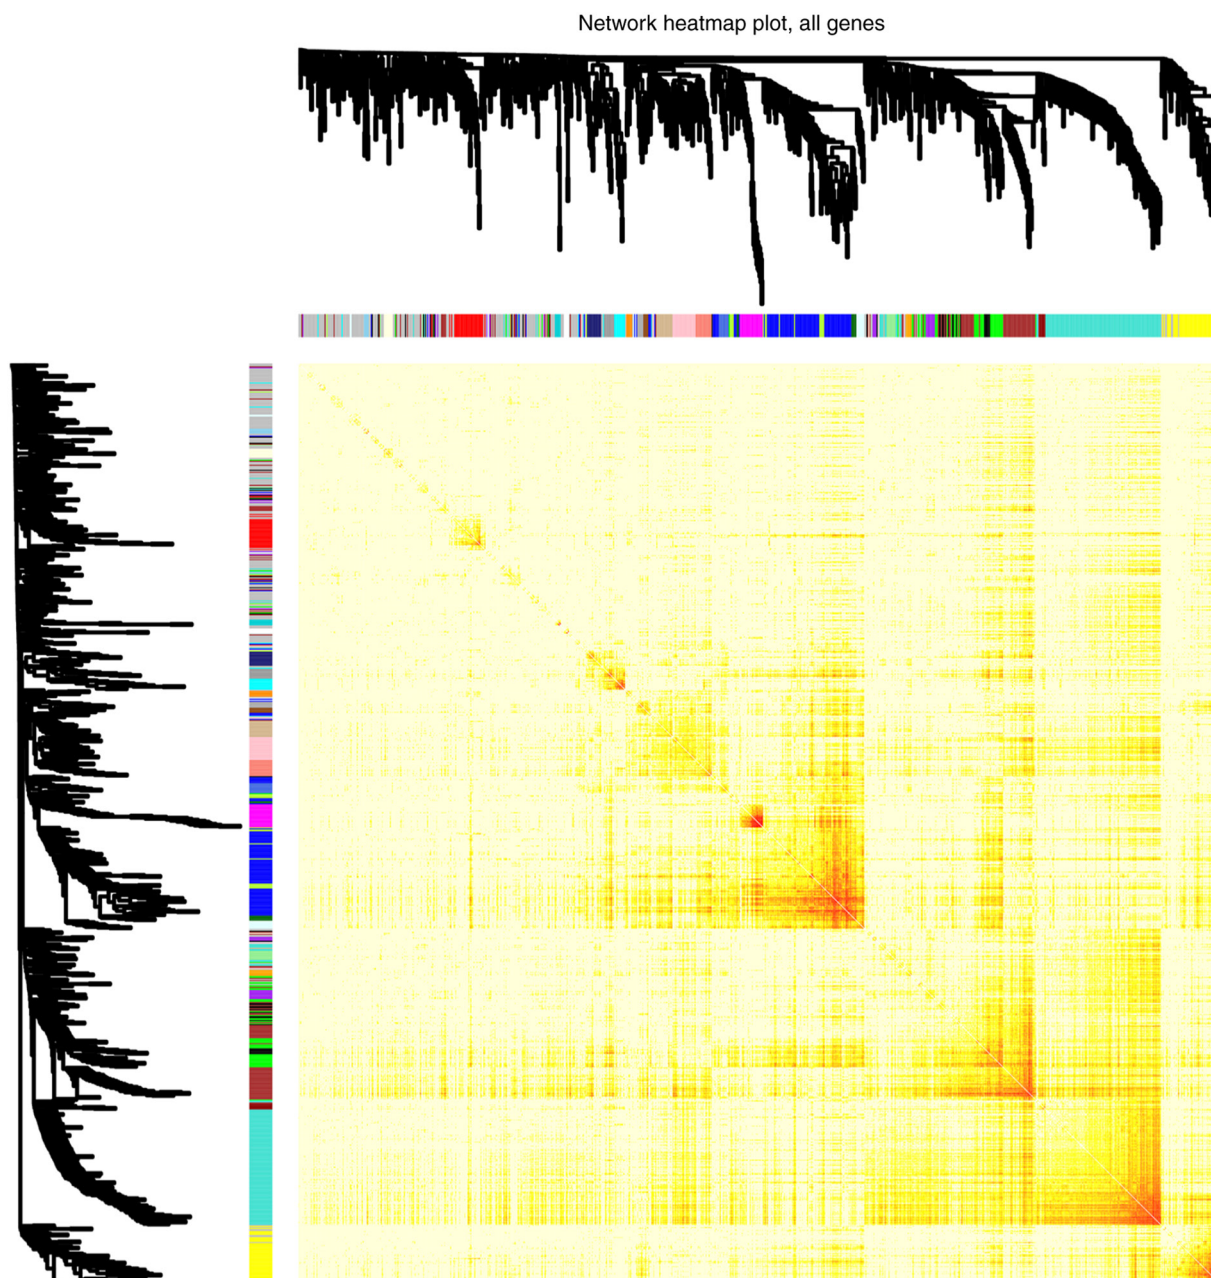

Figure S3. Four DEMs are negatively associated with overall survival in NPC. (A) Patients with a low level of hsa-miR-142-3p (n=200) had a poorer prognosis than those with a high level of hsa-miR-142-3p (n=112) (P=0.0011). (B) The difference in prognosis between patients with a low level of miR-150 (n=190) and those with a high level of hsa-miR-150 (n=122) (P=0.3478) was not significant. (C) Patients with a low level of hsa-miR-29b (n=187) had a poorer prognosis than those with a high level of hsa-miR-29b (n=125) (P=0.0399). (D) Patients with a low level of hsa-miR-29c (n=184) had a poorer prognosis than those with a high level of hsa-miR-29c (n=128) (P=0.013). DEMs, differentially expressed miRNAs; NPC, nasopharyngeal carcinoma; HR, hazard ratio; CI, confidence interval.

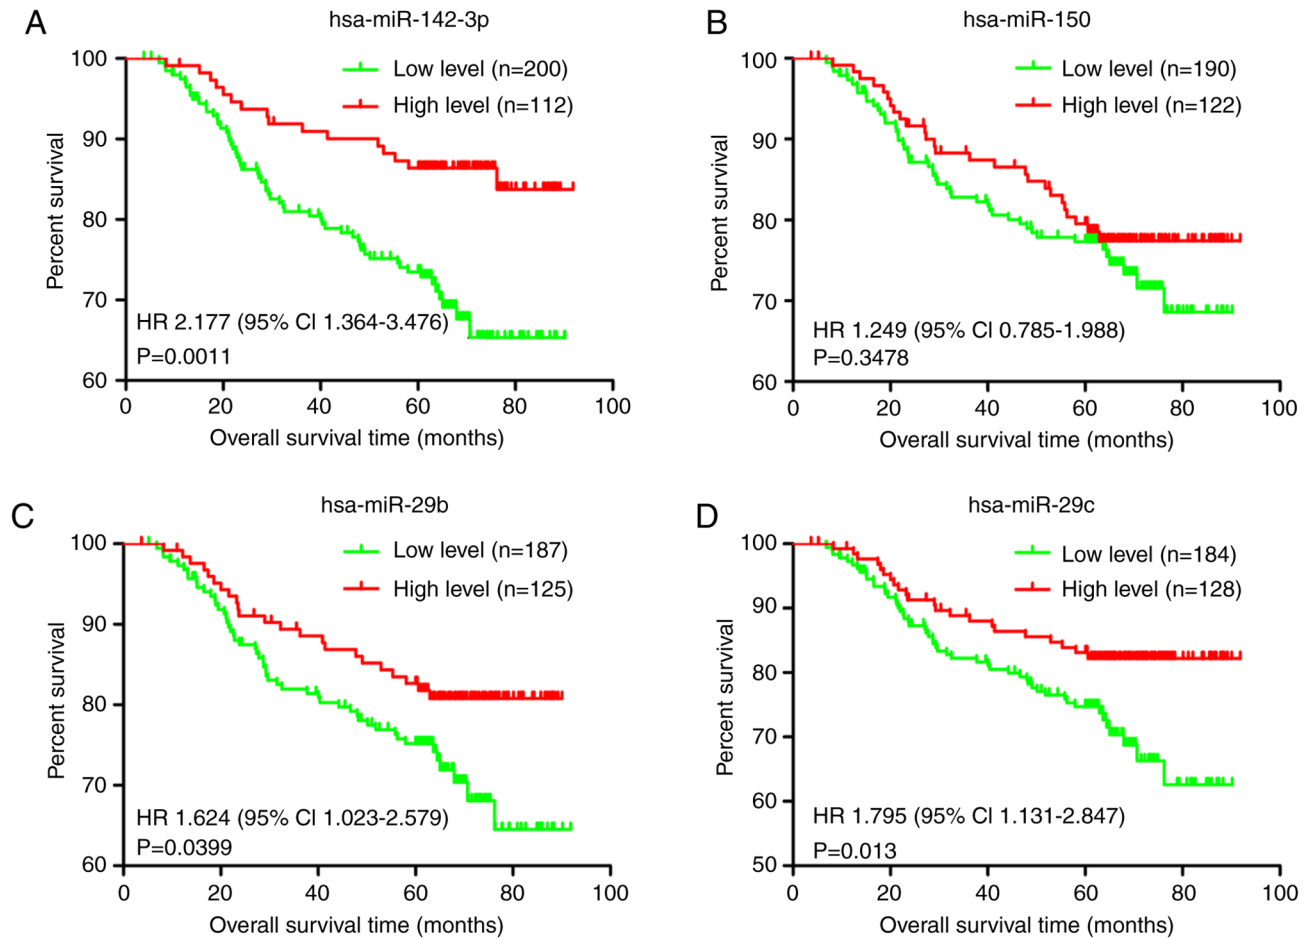

Figure S4. Four DEMs are negatively associated with DFS in NPC. (A) Patients with a low level of hsa-miR-142-3p (n=200) had a poorer prognosis than those with a high level of hsa-miR-142-3p (n=112) (P=0.0004). (B) Patients with a low level of hsa-miR-150 (n=190) had a poorer prognosis than those with a high level of hsa-miR-150 (n=122) (P=0.0471). (C) Patients with a low level of hsa-miR-29b (n=187) had a poorer prognosis than those with a high level of hsa-miR-29b (n=125) (P=0.0466). (D) Patients with a low level of hsa-miR-29c (n=184) had a poorer prognosis than those with a high level of hsa-miR-29c (n=128) (P=0.0012). DEMs, differentially expressed miRNAs; DFS, disease-free survival; NPC, nasopharyngeal carcinoma; HR, hazard ratio; CI, confidence interval.

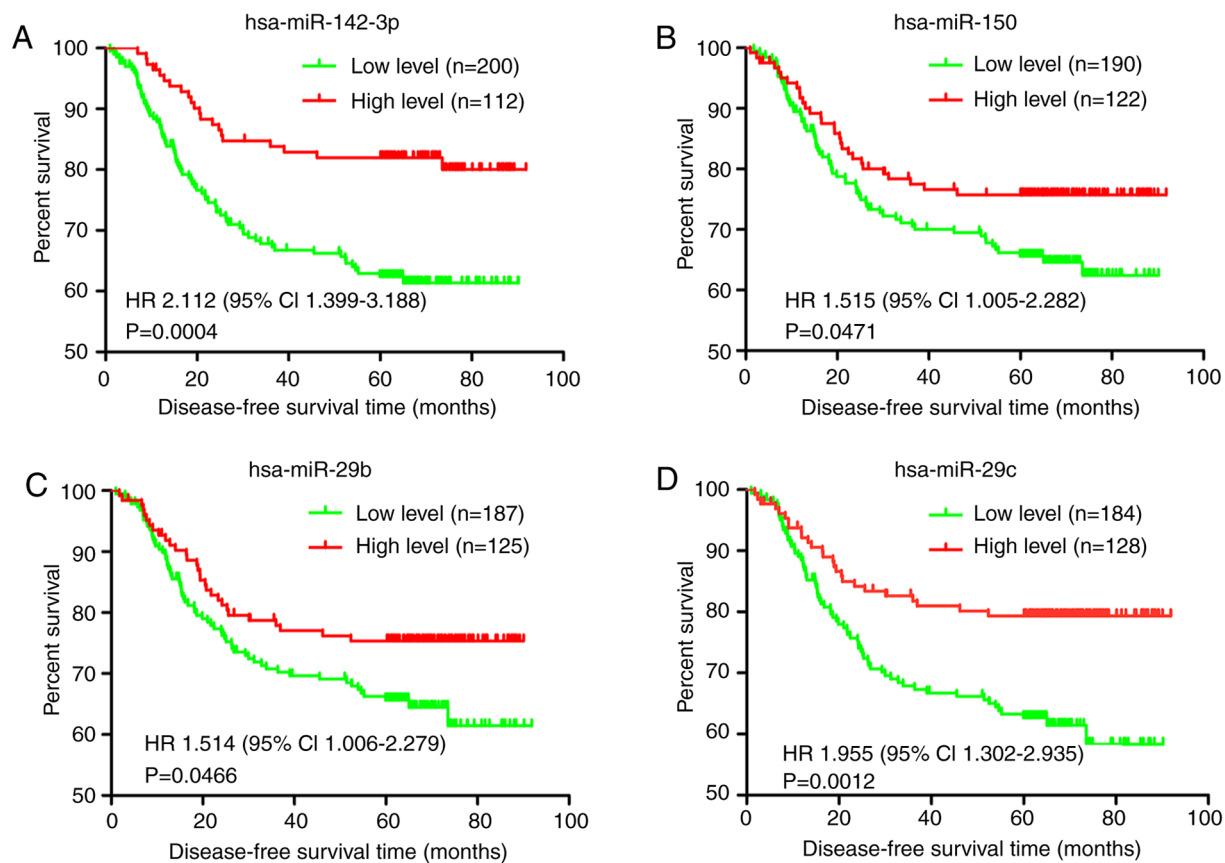

Figure S5. Four DEMs are negatively associated with DMFS in NPC. (A) Patients with a low level of hsa-miR-142-3p (n=200) had a poorer prognosis than those with a high level of hsa-miR-142-3p (n=112) (P=0.0013). (B) The difference in prognosis between patients with a low level of hsa-miR-150 (n=190) and those with a high level of hsa-miR-150 (n=122) (P=0.0615) is not significant. (C) The difference in prognosis between patients with a low level of hsa-miR-29b (n=187) and those with a high level of hsa-miR-29b (n=125) (P=0.6062) is not significant. (D) Patients with a low level of hsa-miR-29c (n=184) had a poorer prognosis than those with a high level of hsa-miR-29c (n=128) (P=0.0041). DEMs, differentially expressed miRNAs; DMFS, distant metastasis-free survival; NPC, nasopharyngeal carcinoma; HR, hazard ratio; CI, confidence interval.

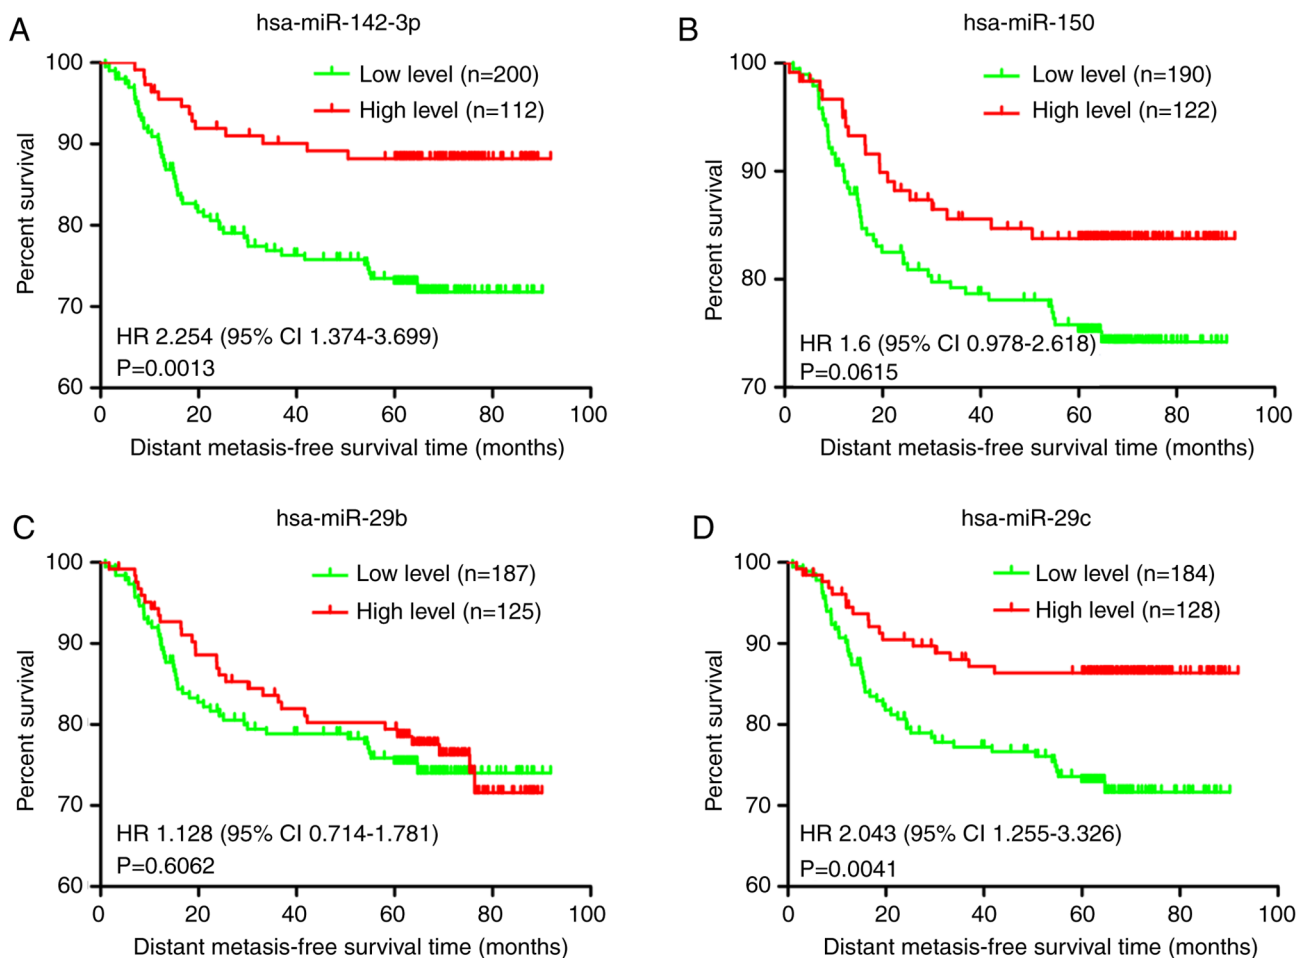

Table SI. Forty-six miRNAs (fold change >2.5, FDR<0.01) differentially expressed in 312 samples of NPC compared with 18 samples of NP.

| microRNAs                  | Fold change | FDR      | log <sub>2</sub> (Fold change) | -log <sub>10</sub> (FDR) |
|----------------------------|-------------|----------|--------------------------------|--------------------------|
| hsa-miR-142-3p             | 0.107       | 1.09E-97 | -3.220                         | 96.964                   |
| hsa-miR-150                | 0.163       | 5.24E-88 | -2.620                         | 87.281                   |
| hsa-miR-29b                | 0.184       | 1.19E-77 | -2.446                         | 76.925                   |
| hsa-let-7f                 | 0.201       | 1.10E-69 | -2.315                         | 68.958                   |
| hsa-miR-101                | 0.256       | 3.97E-69 | -1.964                         | 68.401                   |
| hsa-miR-26b                | 0.287       | 5.30E-65 | -1.800                         | 64.276                   |
| hsa-miR-125a-5p            | 0.270       | 3.25E-59 | -1.888                         | 58.488                   |
| hsa-miR-143                | 0.308       | 4.85E-53 | -1.697                         | 52.315                   |
| hsa-let-7i                 | 0.212       | 1.08E-52 | -2.240                         | 51.965                   |
| hsa-miR-29c                | 0.229       | 5.50E-49 | -2.129                         | 48.259                   |
| hsa-let-7g                 | 0.293       | 2.01E-48 | -1.773                         | 47.698                   |
| hsa-miR-100                | 0.259       | 4.17E-47 | -1.947                         | 46.380                   |
| hsa-miR-30e                | 0.320       | 1.67E-46 | -1.645                         | 45.777                   |
| hsa-miR-342-3p             | 0.366       | 2.01E-46 | -1.449                         | 45.698                   |
| hsa-let-7d                 | 0.256       | 1.47E-45 | -1.965                         | 44.832                   |
| hsa-miR-374a               | 0.390       | 5.05E-43 | -1.358                         | 42.297                   |
| hsa-miR-16                 | 0.230       | 5.28E-36 | -2.118                         | 35.277                   |
| hsa-miR-142-5p             | 0.380       | 2.23E-35 | -1.396                         | 34.652                   |
| hsa-miR-103                | 0.311       | 2.71E-34 | -1.684                         | 33.567                   |
| hsa-miR-29a                | 0.280       | 1.25E-33 | -1.835                         | 32.904                   |
| hsa-miR-203                | 0.346       | 2.51E-32 | -1.532                         | 31.601                   |
| hsa-miR-26a                | 0.266       | 3.28E-30 | -1.908                         | 29.484                   |
| hsa-miR-22                 | 0.386       | 9.67E-28 | -1.374                         | 27.014                   |
| hsa-miR-21                 | 0.326       | 5.13E-24 | -1.615                         | 23.290                   |
| hsa-miR-145                | 0.326       | 3.68E-22 | -1.617                         | 21.435                   |
| hsa-miR-99a                | 0.344       | 8.15E-22 | -1.540                         | 21.089                   |
| hsa-miR-19b                | 0.382       | 3.52E-17 | -1.387                         | 16.453                   |
| hsa-miR-34c-5p             | 0.294       | 1.09E-13 | -1.766                         | 12.964                   |
| hsa-miR-30c-2 <sup>a</sup> | 2.697       | 2.45E-12 | 1.431                          | 11.611                   |
| hsa-miR-451                | 0.315       | 7.96E-11 | -1.666                         | 10.099                   |
| hsa-miR-663                | 2.534       | 1.40E-09 | 1.341                          | 8.853                    |
| hsa-miR-1238               | 2.731       | 4.49E-09 | 1.450                          | 8.348                    |
| hsa-miR-767-5p             | 7.599       | 2.41E-08 | 2.926                          | 7.618                    |
| hsa-miR-25 <sup>a</sup>    | 2.983       | 1.13E-07 | 1.577                          | 6.949                    |
| hsa-miR-29a <sup>a</sup>   | 0.363       | 1.33E-06 | -1.462                         | 5.876                    |
| hsa-miR-194 <sup>a</sup>   | 3.167       | 2.61E-06 | 1.663                          | 5.584                    |
| ebv-miR-BART16             | 3.270       | 6.76E-06 | 1.709                          | 5.170                    |
| hsa-miR-15b                | 0.356       | 6.96E-06 | -1.489                         | 5.158                    |
| ebv-miR-BART10             | 6.218       | 2.27E-04 | 2.637                          | 3.644                    |
| ebv-miR-BART4-3p           | 2.579       | 1.12E-03 | 1.367                          | 2.950                    |
| ebv-miR-BART4              | 3.256       | 1.25E-03 | 1.703                          | 2.904                    |
| hsa-miR-93                 | 2.619       | 1.25E-03 | 1.389                          | 2.904                    |
| hsa-miR-622                | 3.861       | 1.63E-03 | 1.949                          | 2.789                    |
| ebv-miR-BART6-3p           | 3.377       | 2.33E-03 | 1.756                          | 2.633                    |
| hsa-miR-1197               | 0.303       | 3.23E-03 | -1.720                         | 2.491                    |
| ebv-miR-BART2-5p           | 3.458       | 4.75E-03 | 1.790                          | 2.323                    |

These 46 microRNAs were used in the clustering analysis in Fig. 1B and C (cut-off criteria are fold change >2.5 and P<0.01). NPC, nasopharyngeal carcinoma; NP, normal nasopharyngeal tissue; FDR, false discovery rate. The 'a' symbol belongs to the name of miRNA (an old nomenclature).

Table SII. Eight miRNAs in the dark green module that are correlated with DMFS.

---

| miRNAs in the dark green module | Relationship with the dark green module |
|---------------------------------|-----------------------------------------|
| hsa-miR-29c                     | 0.852                                   |
| hsa-miR-29b                     | 0.850                                   |
| hsa-miR-150                     | 0.841                                   |
| hsa-miR-142-3p                  | 0.798                                   |
| hsa-miR-342-3p                  | 0.728                                   |
| hsa-miR-221                     | 0.576                                   |
| hsa-miR-222                     | 0.541                                   |
| hsa-miR-142-5p                  | 0.447                                   |

---

The correlation ranged from 0.447 to 0.852. miRNAs, microRNAs; DMFS, distant metastasis-free survival.

---

Table SIII. Univariate Cox regression analysis of the 46 differentially expressed miRNAs associated with DMFS in the training set of 312 NPC patients.

| miRNAs                     | $\beta$ coefficient | HR   | CI 95%    | P-value              |
|----------------------------|---------------------|------|-----------|----------------------|
| hsa-let-7d                 | -0.24               | 0.79 | 0.58-1.08 | 0.141                |
| hsa-miR-100                | -0.21               | 0.81 | 0.56-1.16 | 0.256                |
| hsa-miR-101                | -0.04               | 0.96 | 0.57-1.64 | 0.894                |
| hsa-miR-103                | -0.14               | 0.87 | 0.66-1.15 | 0.325                |
| hsa-let-7f                 | -0.28               | 0.76 | 0.55-1.04 | 0.088                |
| hsa-let-7i                 | -0.31               | 0.74 | 0.55-0.97 | 0.032 <sup>b</sup>   |
| hsa-miR-143                | 0.06                | 1.06 | 0.65-1.73 | 0.805                |
| hsa-miR-142-3p             | -0.6                | 0.55 | 0.4-0.76  | <0.0001 <sup>b</sup> |
| hsa-miR-142-5p             | 0                   | 1    | 0.6-1.67  | 0.988                |
| hsa-miR-150                | -0.37               | 0.69 | 0.52-0.91 | 0.009 <sup>b</sup>   |
| hsa-miR-15b                | 0.14                | 1.15 | 0.7-1.91  | 0.58                 |
| hsa-miR-16                 | -0.13               | 0.88 | 0.72-1.08 | 0.218                |
| hsa-miR-19b                | -0.1                | 0.9  | 0.67-1.22 | 0.501                |
| hsa-miR-203                | -0.36               | 0.7  | 0.37-1.33 | 0.274                |
| hsa-miR-21                 | -0.01               | 0.99 | 0.82-1.21 | 0.958                |
| hsa-miR-22                 | -0.16               | 0.85 | 0.56-1.29 | 0.442                |
| hsa-miR-26a                | -0.42               | 0.66 | 0.52-0.83 | 0.001 <sup>b</sup>   |
| hsa-miR-26b                | -0.49               | 0.61 | 0.33-1.13 | 0.119                |
| hsa-miR-25 <sup>a</sup>    | 0.04                | 1.04 | 0.74-1.48 | 0.808                |
| hsa-miR-29a                | -0.19               | 0.83 | 0.67-1.02 | 0.083                |
| hsa-miR-29a <sup>a</sup>   | 0.19                | 1.2  | 0.71-2.04 | 0.492                |
| hsa-miR-29b                | -0.42               | 0.66 | 0.46-0.93 | 0.018 <sup>b</sup>   |
| hsa-miR-29c                | -0.66               | 0.52 | 0.37-0.72 | <0.0001 <sup>b</sup> |
| hsa-miR-30e                | -0.79               | 0.45 | 0.31-0.66 | <0.0001 <sup>b</sup> |
| hsa-miR-342-3p             | -0.31               | 0.73 | 0.44-1.23 | 0.242                |
| hsa-miR-374a               | -0.33               | 0.72 | 0.39-1.35 | 0.307                |
| hsa-miR-451                | 0.3                 | 1.35 | 1.04-1.75 | 0.025 <sup>b</sup>   |
| hsa-miR-622                | 0.14                | 1.15 | 0.88-1.51 | 0.316                |
| hsa-miR-663                | 0.28                | 1.33 | 0.82-2.16 | 0.251                |
| hsa-miR-767-5p             | 0.08                | 1.08 | 0.9-1.31  | 0.399                |
| hsa-miR-99a                | -0.05               | 0.96 | 0.71-1.29 | 0.767                |
| hsa-miR-93                 | 0.48                | 1.62 | 1.14-2.3  | 0.007 <sup>b</sup>   |
| hsa-miR-145                | -0.21               | 0.81 | 0.55-1.19 | 0.286                |
| hsa-let-7g                 | -0.32               | 0.73 | 0.52-1.02 | 0.064                |
| hsa-miR-30c-2 <sup>a</sup> | 0.22                | 1.24 | 0.75-2.07 | 0.403                |
| hsa-miR-125a-5p            | 0.3                 | 1.35 | 0.86-2.12 | 0.188                |
| hsa-miR-34c-5p             | -0.12               | 0.89 | 0.57-1.38 | 0.593                |
| hsa-miR-194 <sup>a</sup>   | 0.1                 | 1.1  | 0.76-1.6  | 0.608                |
| hsa-miR-1197               | 0.28                | 1.32 | 0.9-1.94  | 0.152                |
| hsa-miR-1238               | 0.09                | 1.09 | 0.73-1.62 | 0.673                |
| ebv-miR-BART10             | 0.12                | 1.13 | 0.86-1.49 | 0.377                |
| ebv-miR-BART2-5p           | 0.13                | 1.14 | 0.86-1.51 | 0.375                |
| ebv-miR-BART16             | -0.04               | 0.96 | 0.66-1.39 | 0.823                |
| ebv-miR-BART4              | 0.06                | 1.06 | 0.75-1.51 | 0.732                |
| ebv-miR-BART6-3p           | 0.05                | 1.06 | 0.81-1.38 | 0.694                |
| ebv-miR-BART4-3p           | 0.02                | 1.02 | 0.73-1.43 | 0.899                |

The HRs and P-values were calculated utilizing the unadjusted Cox proportional-hazards model. miRNAs, microRNAs; DMFS, distant metastasis-free survival; NPC, nasopharyngeal, carcinoma; HRs, hazards ratios; CI, confidence interval. The 'a' symbol belongs to the name of miRNA (an old nomenclature). <sup>b</sup>P<0.05, statistically significant.



Table SV. Clinical characteristics of patients according to the risk score of a four-miRNA signature.

| Clinical characteristics          | High-risk group (n=156) | Low-risk group (n=156) | P-value <sup>a</sup> |
|-----------------------------------|-------------------------|------------------------|----------------------|
| Age, years                        | 46.88 (SD:10.99)        | 46.98 (SD:11.02)       | 0.94                 |
| Sex, male                         | 126 (81%)               | 107 (69%)              | 0.013 <sup>b</sup>   |
| WHO pathological type             |                         |                        | 0.85                 |
| Undifferentiated non-keratinizing | 151                     | 150                    |                      |
| Differentiated non-keratinizing   | 4                       | 4                      |                      |
| Keratinizing squamous cell        | 1                       | 2                      |                      |
| VCA-IgA                           |                         |                        | 0.85                 |
| <1:80                             | 21                      | 24                     |                      |
| 1:80-1:320                        | 91                      | 87                     |                      |
| ≥1:640                            | 43                      | 45                     |                      |
| EA-IgA                            |                         |                        | 0.52                 |
| <1:10                             | 36                      | 40                     |                      |
| 1:10-1:20                         | 47                      | 53                     |                      |
| ≥1:40                             | 73                      | 63                     |                      |
| T stage                           |                         |                        | 0.0052 <sup>b</sup>  |
| T1                                | 26                      | 40                     |                      |
| T2                                | 38                      | 51                     |                      |
| T3                                | 36                      | 35                     |                      |
| T4                                | 56                      | 30                     |                      |
| N stage                           |                         |                        | 0.41                 |
| N0                                | 19                      | 25                     |                      |
| N1                                | 78                      | 70                     |                      |
| N2                                | 32                      | 40                     |                      |
| N3                                | 27                      | 21                     |                      |
| TNM stage                         |                         |                        | 0.0037 <sup>b</sup>  |
| I                                 | 4                       | 8                      |                      |
| II                                | 38                      | 48                     |                      |
| III                               | 37                      | 54                     |                      |
| IV                                | 77                      | 46                     |                      |
| RT period interruptions           |                         |                        | 0.25                 |
| 0 days                            | 84                      | 94                     |                      |
| ≥1 day                            | 72                      | 62                     |                      |
| RT boosting                       |                         |                        | 0.91                 |
| No                                | 82                      | 81                     |                      |
| Yes                               | 74                      | 75                     |                      |
| Chemotherapy                      |                         |                        | 0.19                 |
| No                                | 26                      | 18                     |                      |
| Yes                               | 130                     | 138                    |                      |
| DMFS                              |                         | <0.0001 <sup>b</sup>   |                      |
| Distant metastases                | 63 (40%)                | 3 (2%)                 |                      |
| 5-year                            | 40%                     | 96%                    |                      |
| RFS                               |                         |                        | <0.0001 <sup>b</sup> |
| Relapse                           | 31 (20%)                | 12 (8%)                |                      |
| 5-year                            | 43%                     | 91%                    |                      |
| DFS                               |                         |                        | <0.0001 <sup>b</sup> |
| Relapse or death                  | 81 (52%)                | 14 (9%)                |                      |
| 5-year                            | 38%                     | 91%                    |                      |
| OS                                |                         |                        | <0.0001 <sup>b</sup> |
| Death                             | 69 (44%)                | 5 (3%)                 |                      |
| 5-year                            | 43%                     | 97%                    |                      |

<sup>a</sup>χ<sup>2</sup> test and Student's t-test. miRNA, microRNA; VCA-IgA, viral capsid antigen-immunoglobulin A; EA-IgA, early antigen-immunoglobulin A; RT, radiotherapy; TNM, tumour-node-metastasis; DMFS, distant metastasis-free survival; RFS, relapse-free survival; OS, overall survival.

<sup>b</sup>P<0.05, statistically significant.

Table SVI. Summary of the univariate Cox regression analysis of prognostic factors for DMFS in 312 NPC patients.

| Variable                                            | Regression coefficient | HR   | CI 95%     | P-value            |
|-----------------------------------------------------|------------------------|------|------------|--------------------|
| Age ( $\geq 45$ years vs. $< 45$ years)             | 0.25                   | 1.28 | 0.78-2.1   | 0.328              |
| AJCC7 N stage (stage 2-3 vs. 0-1)                   | 0.78                   | 2.18 | 1.34-3.53  | 0.002 <sup>a</sup> |
| AJCC7 T stage (stage III-IV vs. I-II)               | 1.47                   | 4.36 | 1.99-9.55  | $< 0.0001^a$       |
| AJCC7 TNM stage (stage III-IV vs. I-II)             | 0.78                   | 2.18 | 1.3-3.63   | 0.003 <sup>a</sup> |
| Concurrent chemotherapy (yes vs. no)                | 0.04                   | 1.04 | 0.52-2.11  | 0.903              |
| EA-IgA ( $\geq 1:40$ vs. 1:10-1:20 vs. $< 1:10$ )   | 0.3                    | 1.36 | 0.98-1.87  | 0.064              |
| RT boosting (yes vs. no)                            | -0.13                  | 0.88 | 0.54-1.43  | 0.605              |
| RT interrupt (0 day vs. $> 1$ days)                 | 0.1                    | 1.1  | 0.68-1.79  | 0.7                |
| Risk score                                          | 2.16                   | 8.68 | 5.74-13.12 | $< 0.0001^a$       |
| Sex (men vs. women)                                 | -0.62                  | 0.54 | 0.28-1.02  | 0.059              |
| VCA-IgA ( $\geq 1:640$ vs. 1:80-1:320 vs. $< 1:8$ ) | 0.06                   | 1.06 | 0.72-1.55  | 0.766              |
| WHO type                                            | -0.23                  | 0.79 | 0.34-1.83  | 0.583              |

The HRs and P-values were calculated using univariate Cox regression analysis. DMFS, distant metastasis-free survival; NPC, nasopharyngeal carcinoma; HR, hazard ratio; CI, confidence interval; TNM, tumour-node-metastasis; EA-IgA, early antigen immunoglobulin A; RT, radiotherapy; VCA-IgA, viral capsid antigen immunoglobulin A. <sup>a</sup>P $< 0.05$ , statistically significant.

Table SVII. Summary of the multivariable Cox regression analysis of prognostic factors for DMFS and risk score in 312 NPC patients.

| Variable                                          | Regression coefficient | HR    | CI 95%      | P-value            |
|---------------------------------------------------|------------------------|-------|-------------|--------------------|
| AJCC7 N stage (stage 2-3 vs. 0-1)                 | 0.57                   | 1.76  | 0.958-3.233 | 0.068              |
| AJCC7 T stage (stage III-IV vs. I-II)             | 0.78                   | 2.18  | 1.085-4.393 | 0.029 <sup>a</sup> |
| AJCC7 TNM stage (stage III-IV vs. I-II)           | 0.22                   | 1.24  | 0.417-3.715 | 0.695              |
| EA-IgA ( $\geq 1:40$ vs. 1:10-1:20 vs. $< 1:10$ ) | 0.09                   | 1.1   | 0.784-1.53  | 0.595              |
| Risk score                                        | 2.4                    | 11.02 | 6.58-18.463 | $< 0.0001^a$       |
| Sex (men vs. women)                               | -0.2                   | 0.82  | 0.424-1.586 | 0.555              |

The HRs and P-values were calculated through an adjusted multivariate Cox regression analysis, including risk score (high risk vs. low risk), AJCC7 N stage (stage 2-3 vs. 0-1), AJCC7 T stage (stage III-IV vs. I-II), AJCC7 TNM stage (stage III-IV vs. I-II), EA-IgA ( $\geq 1:40$  vs. 1:10-1:20 vs.  $< 1:10$ ), sex; DMFS, distant metastasis-free survival; NPC, nasopharyngeal carcinoma; EA-IgA, early antigen-immunoglobulin A. <sup>a</sup>P $< 0.05$ , statistically significant.

Table SVIII. The 127 upregulated mRNAs (fold change >1.5, FDR <0.05) differentially expressed between 31 NPC samples and 10 normal samples.

| Gene symbol | FDR      | logFC | Gene title                                                    |
|-------------|----------|-------|---------------------------------------------------------------|
| NID1        | 4.81E-09 | 2.23  | Nidogen 1                                                     |
| COL4A2      | 5.03E-08 | 2.19  | Collagen type IV $\alpha$ 2 chain                             |
| COL4A1      | 6.52E-08 | 2.39  | Collagen type IV $\alpha$ 1 chain                             |
| FMNL2       | 1.16E-06 | 1.63  | Formin like 2                                                 |
| SPARC       | 3.85E-06 | 1.85  | Secreted protein acidic and cysteine rich                     |
| COL1A1      | 4.57E-06 | 2.62  | Collagen type I $\alpha$ 1 chain                              |
| CASK        | 6.29E-06 | 1.25  | Calcium/calmodulin dependent serine protein kinase            |
| SCML2       | 1.53E-05 | 0.78  | Sex comb on midleg-like 2 ( <i>Drosophila</i> )               |
| NRAS        | 1.64E-05 | 0.70  | Neuroblastoma RAS viral oncogene homolog                      |
| NAV1        | 1.92E-05 | 0.65  | Neuron navigator 1                                            |
| COL5A1      | 4.72E-05 | 0.94  | Collagen type V $\alpha$ 1 chain                              |
| FBN1        | 5.79E-05 | 1.57  | Fibrillin 1                                                   |
| AKT3        | 7.07E-05 | 1.42  | AKT serine/threonine kinase 3                                 |
| GGCT        | 7.63E-05 | 1.09  | $\gamma$ -Glutamylcyclotransferase                            |
| CDC7        | 8.24E-05 | 1.17  | Cell division cycle 7                                         |
| NUCKS1      | 1.01E-04 | 1.00  | Nuclear casein kinase and cyclin dependent kinase substrate 1 |
| HOXA10      | 1.23E-04 | 1.36  | Homeobox A10                                                  |
| COL3A1      | 1.30E-04 | 2.27  | Collagen type III $\alpha$ 1 chain                            |
| TAF5        | 1.34E-04 | 0.66  | TATA-box binding protein associated factor 5                  |
| CBX2        | 1.38E-04 | 0.76  | Chromobox 2                                                   |
| CYCS        | 1.72E-04 | 0.93  | Cytochrome c, somatic                                         |
| TDG         | 1.74E-04 | 0.85  | Thymine DNA glycosylase                                       |
| TRA2B       | 1.79E-04 | 0.64  | Transformer 2 $\beta$ homolog ( <i>Drosophila</i> )           |
| CTDSPL2     | 1.81E-04 | 0.73  | CTD small phosphatase like 2                                  |
| CCND2       | 1.95E-04 | 1.54  | Cyclin D2                                                     |
| ABCE1       | 2.32E-04 | 0.99  | ATP binding cassette subfamily E member 1                     |
| RHEB        | 3.07E-04 | 0.83  | Ras homolog enriched in brain                                 |
| CAPRN1      | 3.25E-04 | 1.09  | Cell cycle associated protein 1                               |
| SENPI       | 3.41E-04 | 0.92  | SUMO1/sentrin specific peptidase 1                            |
| MAPRE1      | 3.53E-04 | 0.74  | Microtubule associated protein RP/EB family member 1          |
| SUB1        | 3.84E-04 | 1.32  | SUB1 homolog, transcriptional regulator                       |
| VASH2       | 3.98E-04 | 2.66  | Vasohibin 2                                                   |
| EIF2S2      | 4.07E-04 | 0.85  | Eukaryotic translation initiation factor 2 subunit beta       |
| GPATCH2     | 4.07E-04 | 1.04  | G-patch domain containing 2                                   |
| MTR         | 4.69E-04 | 0.86  | 5-Methyltetrahydrofolate-homocysteine methyltransferase       |
| E2F3        | 4.85E-04 | 1.04  | E2F transcription factor 3                                    |
| LAMC1       | 5.21E-04 | 1.04  | Laminin subunit gamma 1                                       |
| BOD1        | 5.33E-04 | 0.89  | Biorientation of chromosomes in cell division 1               |
| CAND1       | 5.60E-04 | 1.15  | Cullin associated and neddylation dissociated 1               |
| MSL1        | 6.73E-04 | 0.67  | Male specific lethal 1 homolog                                |
| OSTC        | 7.75E-04 | 0.64  | Oligosaccharyltransferase complex non-catalytic subunit       |
| SDC2        | 8.13E-04 | 1.38  | Syndecan 2                                                    |
| COL15A1     | 8.40E-04 | 1.55  | Collagen type XV $\alpha$ 1 chain                             |
| SCML1       | 9.17E-04 | 1.06  | Sex comb on midleg-like 1 ( <i>Drosophila</i> )               |
| KDELC1      | 1.01E-03 | 0.83  | KDEL motif containing 1                                       |
| ADA         | 1.06E-03 | 1.56  | Adenosine deaminase                                           |
| NUDCD1      | 1.18E-03 | 0.92  | NudC domain containing 1                                      |
| ITGAV       | 1.24E-03 | 1.12  | Integrin subunit $\alpha$ V                                   |
| SCAI        | 1.31E-03 | 1.46  | Suppressor of cancer cell invasion                            |
| FLVCR1      | 1.55E-03 | 1.21  | Feline leukemia virus subgroup C cellular receptor 1          |
| PMP22       | 1.57E-03 | 0.75  | Peripheral myelin protein 22                                  |
| EIF4E2      | 1.73E-03 | 0.73  | Eukaryotic translation initiation factor 4E family member 2   |
| PA2G4       | 1.74E-03 | 0.87  | Proliferation-associated 2G4                                  |
| RPRD1A      | 1.95E-03 | 0.82  | Regulation of nuclear pre-mRNA domain containing 1A           |
| USP31       | 2.10E-03 | 1.32  | Ubiquitin specific peptidase 31                               |
| MAT2A       | 2.12E-03 | 0.60  | Methionine adenosyltransferase 2A                             |
| PMAIP1      | 2.26E-03 | 1.98  | Phorbol-12-myristate-13-acetate-induced protein 1             |
| FRAS1       | 2.29E-03 | 1.75  | Fraser extracellular matrix complex subunit 1                 |

Table SVIII. Continued.

| Gene symbol | FDR      | logFC | Gene title                                                |
|-------------|----------|-------|-----------------------------------------------------------|
| CALU        | 2.31E-03 | 0.74  | Calumenin                                                 |
| AMOTL1      | 2.34E-03 | 1.02  | Angiomotin like 1                                         |
| XPO1        | 2.47E-03 | 0.69  | Exportin 1                                                |
| ZNF267      | 2.48E-03 | 0.87  | Zinc finger protein 267                                   |
| TMEM33      | 2.55E-03 | 0.71  | Transmembrane protein 33                                  |
| SLC39A10    | 2.77E-03 | 0.91  | Solute carrier family 39 member 10                        |
| ATL2        | 2.96E-03 | 1.13  | Atlantin GTPase 2                                         |
| DHTKD1      | 3.07E-03 | 0.68  | Dehydrogenase E1 and transketolase domain containing 1    |
| HNRNPU      | 3.08E-03 | 0.79  | Heterogeneous nuclear ribonucleoprotein U                 |
| BLMH        | 3.26E-03 | 0.71  | Bleomycin hydrolase                                       |
| ACSL4       | 3.71E-03 | 0.87  | Acyl-CoA synthetase long-chain family member 4            |
| SLC16A1     | 3.73E-03 | 1.34  | Solute carrier family 16 member 1                         |
| PPP3R1      | 4.19E-03 | 0.60  | Protein phosphatase 3 regulatory subunit B, $\alpha$      |
| RCHY1       | 4.25E-03 | 0.67  | Ring finger and CHY zinc finger domain containing 1       |
| MMD         | 4.74E-03 | 1.01  | Monocyte to macrophage differentiation associated         |
| SIKE1       | 4.97E-03 | 0.89  | Suppressor of IKBKE 1                                     |
| ROBO1       | 5.17E-03 | 1.16  | Roundabout guidance receptor 1                            |
| ADAM12      | 5.37E-03 | 0.88  | ADAM metallopeptidase domain 12                           |
| UBFD1       | 5.40E-03 | 0.68  | Ubiquitin family domain containing 1                      |
| NUP160      | 5.70E-03 | 0.77  | Nucleoporin 160                                           |
| ADIPOR2     | 6.68E-03 | 0.69  | Adiponectin receptor 2                                    |
| PRLR        | 6.83E-03 | 1.50  | Prolactin receptor                                        |
| ISG20L2     | 6.92E-03 | 0.70  | Interferon stimulated exonuclease gene 20 like 2          |
| TET1        | 7.01E-03 | 0.59  | Tet methylcytosine dioxygenase 1                          |
| DCAF6       | 7.03E-03 | 0.80  | DDB1 and CUL4 associated factor 6                         |
| PTEN        | 7.24E-03 | 0.65  | Phosphatase and tensin homolog                            |
| MBTD1       | 7.26E-03 | 0.87  | Mbt domain containing 1                                   |
| RPS15A      | 7.44E-03 | 0.75  | Ribosomal protein S15a                                    |
| PLXNA1      | 7.62E-03 | 0.79  | Plexin A1                                                 |
| RNF165      | 8.25E-03 | 1.08  | Ring finger protein 165                                   |
| ARPP19      | 8.40E-03 | 0.85  | cAMP regulated phosphoprotein 19                          |
| WTAP        | 1.04E-02 | 0.61  | Wilms tumor 1 associated protein                          |
| KDEL2       | 1.13E-02 | 0.60  | KDEL endoplasmic reticulum protein retention receptor 2   |
| TNRC6A      | 1.14E-02 | 0.79  | Trinucleotide repeat containing 6A                        |
| PDHX        | 1.19E-02 | 0.72  | Pyruvate dehydrogenase complex component X                |
| UBE2W       | 1.25E-02 | 0.61  | Ubiquitin conjugating enzyme E2 W (putative)              |
| SYNCRIP     | 1.28E-02 | 0.66  | Synaptotagmin binding cytoplasmic RNA interacting protein |
| COMMD2      | 1.29E-02 | 0.68  | COMM domain containing 2                                  |
| SERBP1      | 1.40E-02 | 0.76  | SERPINE1 mRNA binding protein 1                           |
| FBXO45      | 1.40E-02 | 0.76  | F-box protein 45                                          |
| TADA1       | 1.47E-02 | 0.63  | Transcriptional adaptor 1                                 |
| CCNT2       | 1.50E-02 | 0.74  | Cyclin T2                                                 |
| SS18L1      | 1.62E-02 | 0.71  | SS18L1, nBAF chromatin remodeling complex subunit         |
| CCDC117     | 1.65E-02 | 0.72  | Coiled-coil domain containing 117                         |
| SPRED1      | 1.71E-02 | 0.76  | Sprouty related EVH1 domain containing 1                  |
| COL7A1      | 1.80E-02 | 0.74  | Collagen type VII $\alpha$ 1 chain                        |
| CDC73       | 1.83E-02 | 0.62  | Cell division cycle 73                                    |
| RFX7        | 1.87E-02 | 0.71  | Regulatory factor X7                                      |
| CHSY1       | 1.98E-02 | 0.65  | Chondroitin sulfate synthase 1                            |
| LPL         | 2.14E-02 | 1.47  | Lipoprotein lipase                                        |
| PXDN        | 2.16E-02 | 1.20  | Peroxidasin                                               |
| WASF1       | 2.21E-02 | 0.81  | WAS protein family member 1                               |
| IREB2       | 2.30E-02 | 0.60  | Iron responsive element binding protein 2                 |
| CLIC4       | 2.40E-02 | 0.78  | Chloride intracellular channel 4                          |
| SCD         | 2.43E-02 | 0.94  | Stearoyl-CoA desaturase                                   |
| ATP2B4      | 2.80E-02 | 0.62  | ATPase plasma membrane Ca <sup>2+</sup> transporting 4    |
| NUFIP2      | 2.87E-02 | 0.59  | NUFIP2, FMR1 interacting protein 2                        |
| DCUN1D4     | 3.37E-02 | 0.79  | Defective in cullin neddylation 1 domain containing 4     |
| LRP6        | 3.48E-02 | 0.92  | LDL receptor related protein 6                            |

Table SVIII. Continued.

| Gene symbol | FDR      | logFC | Gene title                                              |
|-------------|----------|-------|---------------------------------------------------------|
| USP37       | 3.58E-02 | 0.60  | Ubiquitin specific peptidase 37                         |
| TMTC3       | 3.83E-02 | 0.91  | Transmembrane and tetratricopeptide repeat containing 3 |
| METAP2      | 4.09E-02 | 0.66  | Methionyl aminopeptidase 2                              |
| ABCA1       | 4.11E-02 | 0.60  | ATP binding cassette subfamily A member 1               |
| CA2         | 4.20E-02 | 0.67  | Carbonic anhydrase 2                                    |
| CPS1        | 4.33E-02 | 0.76  | Carbamoyl-phosphate synthase 1                          |
| QKI         | 4.45E-02 | 0.67  | QKI, KH domain containing RNA binding                   |
| HMGA2       | 4.54E-02 | 1.06  | High mobility group AT-hook 2                           |
| TNFAIP3     | 4.56E-02 | 0.81  | TNF- $\alpha$ induced protein 3                         |
| RHOBTB3     | 4.69E-02 | 0.85  | Rho related BTB domain containing 3                     |

FDR, false discovery rate; NPC, nasopharyngeal carcinoma.

Table SIX. Summary of major implicated pathways of 127 screened genes.

| Term                             | P-value  | Fold Enrichment | Count | Genes                                                                                             |
|----------------------------------|----------|-----------------|-------|---------------------------------------------------------------------------------------------------|
| PI3K/Akt signaling pathway       | 2.69E-06 | 4.90            | 14    | NRAS, COL4A2, COL4A1, PRLR, CCND2, ITGAV, COL3A1, RHEB, COL1A1, LAMC1, PTEN, EIF4E2, COL5A1, AKT3 |
| Small cell lung cancer           | 4.87E-06 | 11.36           | 8     | COL4A2, E2F3, COL4A1, ITGAV, CYCS, LAMC1, PTEN, AKT3                                              |
| Focal adhesion                   | 3.63E-05 | 5.86            | 10    | COL4A2, COL4A1, CCND2, ITGAV, COL3A1, COL1A1, LAMC1, PTEN, AKT3, COL5A1                           |
| ECM-receptor interaction         | 6.73E-05 | 9.71            | 7     | COL4A2, COL4A1, ITGAV, COL3A1, COL1A1, LAMC1, COL5A1                                              |
| Protein digestion and absorption | 7.18E-05 | 9.60            | 7     | COL4A2, COL4A1, COL7A1, COL3A1, COL15A1, COL1A1, COL5A1                                           |
| Amoebiasis                       | 1.62E-03 | 6.83            | 6     | COL4A2, COL4A1, COL3A1, COL1A1, LAMC1, COL5A1                                                     |
| p53 signaling pathway            | 2.06E-03 | 9.01            | 5     | CCND2, CYCS, RCHY1, PMAIP1, PTEN                                                                  |
| mTOR signaling pathway           | 1.15E-02 | 8.32            | 4     | RHEB, PTEN, AKT3, EIF4E2                                                                          |
| Pathways in cancer               | 1.35E-02 | 2.76            | 9     | NRAS, COL4A2, E2F3, COL4A1, ITGAV, CYCS, LAMC1, PTEN, AKT3                                        |
| Glioma                           | 1.56E-02 | 7.43            | 4     | NRAS, E2F3, PTEN, AKT3                                                                            |
| Melanoma                         | 1.98E-02 | 6.80            | 4     | NRAS, E2F3, PTEN, AKT3                                                                            |
| Prolactin signaling pathway      | 1.98E-02 | 6.80            | 4     | NRAS, PRLR, CCND2, AKT3                                                                           |
| Hepatitis B                      | 2.99E-02 | 4.16            | 5     | NRAS, E2F3, CYCS, PTEN, AKT3                                                                      |
| Prostate cancer                  | 3.45E-02 | 5.49            | 4     | NRAS, E2F3, PTEN, AKT3                                                                            |
| Choline metabolism in cancer     | 4.87E-02 | 4.78            | 4     | NRAS, WASF1, RHEB, AKT3                                                                           |

Table SX. The top 20 GO terms of 127 screened genes.

| Category | Term                                        | P-value  | Fold Enrichment | Count | Genes                                                                                                                                                                                                                                                                                                                                                                                                                                                                                                                                                                                                            |
|----------|---------------------------------------------|----------|-----------------|-------|------------------------------------------------------------------------------------------------------------------------------------------------------------------------------------------------------------------------------------------------------------------------------------------------------------------------------------------------------------------------------------------------------------------------------------------------------------------------------------------------------------------------------------------------------------------------------------------------------------------|
| BP       | Extracellular matrix organization           | 1.73E-07 | 8.426898628     | 12    | COL4A2, PXDN, COL4A1, COL7A1, ITGAV, COL3A1, FBN1, NID1, COL1A1, SPARC, LAMC1, COL5A1                                                                                                                                                                                                                                                                                                                                                                                                                                                                                                                            |
| BP       | Collagen catabolic process                  | 6.59E-06 | 15.05430328     | 7     | COL4A2, COL4A1, COL7A1, COL3A1, COL15A1, COL1A1,                                                                                                                                                                                                                                                                                                                                                                                                                                                                                                                                                                 |
| BP       | Endodermal cell differentiation             | 9.41E-04 | 20.39101396     | 4     | COL4A2, COL7A1, ITGAV, HMGA2                                                                                                                                                                                                                                                                                                                                                                                                                                                                                                                                                                                     |
| BP       | Blood vessel development                    | 0.002562 | 14.48835203     | 4     | ITGAV, COL1A1, COL5A1, FLVCR1                                                                                                                                                                                                                                                                                                                                                                                                                                                                                                                                                                                    |
| BP       | Cell division                               | 0.003846 | 3.539297424     | 9     | CDC7, CCNT2, BOD1, CCND2, ARPP19, USP37, CDC73, MAPRE1,                                                                                                                                                                                                                                                                                                                                                                                                                                                                                                                                                          |
| BP       | Response to drugs                           | 0.006493 | 3.622088007     | 8     | XPO1, LPL, BLMH, COL1A1, ABCA1, CPS1, PTEN, ADA                                                                                                                                                                                                                                                                                                                                                                                                                                                                                                                                                                  |
| BP       | Negative regulation of translation          | 0.008442 | 9.49236857      | 4     | IREB2, SYNCRIP, CAPRIN1, EIF4E2                                                                                                                                                                                                                                                                                                                                                                                                                                                                                                                                                                                  |
| BP       | Covalent chromatin modification             | 0.009038 | 6.090236472     | 5     | MBTD1, TDG, CBX2, TET1, SS18L1                                                                                                                                                                                                                                                                                                                                                                                                                                                                                                                                                                                   |
| BP       | Heart development                           | 0.010475 | 4.512765386     | 6     | ROBO1, COL3A1, FBN1, ADIPOR2, SPARC, PTEN                                                                                                                                                                                                                                                                                                                                                                                                                                                                                                                                                                        |
| CC       | Extracellular matrix                        | 1.59E-08 | 7.329472329     | 15    | FRAS1, LPL, COL4A2, PXDN, COL4A1, COL3A1, FBN1, COL15A1, RPS15A, NID1, HNRNPU, COL5A1, COL7A1, COL1A1, LAMC1                                                                                                                                                                                                                                                                                                                                                                                                                                                                                                     |
| CC       | Basement membrane                           | 6.79E-08 | 16.47739602     | 9     | FRAS1, COL4A1, COL7A1, FBN1, CASK, NID1, SPARC, LAMC1,                                                                                                                                                                                                                                                                                                                                                                                                                                                                                                                                                           |
| CC       | Endoplasmic reticulum lumen                 | 3.62E-04 | 6.026455026     | 8     | COL4A2, KDELC1, COL4A1, COL7A1, COL3A1, COL15A1,                                                                                                                                                                                                                                                                                                                                                                                                                                                                                                                                                                 |
| CC       | Nucleoplasm                                 | 0.003605 | 1.662470352     | 32    | CCNT2, XPO1, E2F3, TRA2B, PPP3R1, RPS15A, SYNCRIP, CBX2, CDC73, TADA1, WTAP, PTEN, SPRED1, RCHY1, TNRC6A, RPRD1A, AKT3, CDC7, TAF5, SCAI, ARPP19, ISG20L2, HMGA2, HNRNPU, CTDSPL2, PA2G4, SENP1, CCND2, MSL1, TDG, CAND1, ADAM12                                                                                                                                                                                                                                                                                                                                                                                 |
| CC       | Collagen trimer                             | 0.003702 | 7.860593513     | 5     | COL7A1, COL3A1, COL15A1, COL1A1, COL5A1                                                                                                                                                                                                                                                                                                                                                                                                                                                                                                                                                                          |
| CC       | Cell surface                                | 0.012401 | 2.668540971     | 10    | LPL, PRLR, ROBO1, CLIC4, ITGAV, LRP6, SPARC, HNRNPU, ADA,                                                                                                                                                                                                                                                                                                                                                                                                                                                                                                                                                        |
| MF       | Extracellular matrix structural constituent | 2.88E-08 | 18.2870727      | 9     | COL4A2, PXDN, COL4A1, COL3A1, FBN1, COL15A1, COL1A1, LAMC1, COL5A1                                                                                                                                                                                                                                                                                                                                                                                                                                                                                                                                               |
| MF       | Platelet-derived growth factor              | 5.97E-05 | 49.50439883     | 4     | COL4A1, COL3A1, COL1A1, COL5A1                                                                                                                                                                                                                                                                                                                                                                                                                                                                                                                                                                                   |
| MF       | Protein binding                             | 3.54E-04 | 1.301709292     | 84    | CCNT2, XPO1, E2F3, ATL2, WASF1, CASK, SYNCRIP, CBX2, PMAIP1, AMOTL1, WTAP, PTEN, SDC2, ATP2B4, NUDCD1, ROBO1, QKI, SPRED1, RPRD1A, SS18L1, AKT3, FLVCR1, CDC7, ABCE1, CYCS, SCAI, ISG20L2, HMGA2, HNRNPU, BLMH, PA2G4, SENP1, SIKE1, CLIC4, CCND2, SERBP1, EIF2S2, UBE2W, COMM2D2, CAND1, CA2, MAPRE1, COL1A1, PMP22, TNFAIP3, DCUN1D4, OSTC, NUP160, TRA2B, COL3A1, PPP3R1, RPS15A, CDC73, ABCA1, NUFIP2, ADA, CALU, COL7A1, TMEM33, ITGAV, HOXA10, USP37, RCHY1, PDHX, TNRC6A, FBXO45, RHOBTB3, LPL, COL4A2, COL4A1, MAT2A, SUB1, TAF5, FBN1, IREB2, SPARC, CPS1, PRLR, MTR, TDG, LRP6, TMTC3, CCDC117, EIF4E2 |
| MF       | Poly(A) RNA binding                         | 0.003376 | 2.170476299     | 18    | METAP2, NUCKS1, SUB1, TRA2B, RPS15A, SYNCRIP, ISG20L2, NUFIP2, HNRNPU, CAPRIN1, PA2G4, UBF1, SERBP1, EIF2S2, QKI, MAPRE1, TNRC6A, EIF4E2                                                                                                                                                                                                                                                                                                                                                                                                                                                                         |
| MF       | Apolipoprotein                              | 0.004525 | 29.17223502     | 3     | LPL, LRP6, ABCA1                                                                                                                                                                                                                                                                                                                                                                                                                                                                                                                                                                                                 |

GO, Gene ontology; BP, biological process; CC, cellular component; MF, molecular function.
